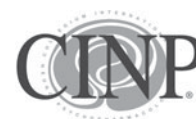

# Repeated treatment with electroconvulsive seizures induces HDAC2 expression and down-regulation of NMDA receptor-related genes through histone deacetylation in the rat frontal cortex

Hong Geun Park<sup>1,2</sup>, Hyun Sook Yu<sup>1,2</sup>, Soyoung Park<sup>1</sup>, Yong Min Ahn<sup>1,3,4</sup>, Yong Sik Kim<sup>5\*</sup> and Se Hyun Kim<sup>1,4\*</sup>

<sup>1</sup> Biomedical Research Institute, Seoul National University Hospital, Seoul, Republic of Korea

<sup>2</sup> Department of Biomedical Sciences, Seoul National University College of Medicine, Seoul, Republic of Korea

<sup>3</sup> Department of Psychiatry and Behavioral Sciences, Seoul National University College of Medicine, Seoul, Republic of Korea

<sup>4</sup> Institute of Human Behavioral Medicine, Medical Research Center, Seoul National University, Seoul, Republic of Korea

<sup>5</sup> Department of Neuropsychiatry, Dongguk University International Hospital, Dongguk University Medical School, Goyang-si, Gyeonggi-do, Republic of Korea

## Abstract

The enzymatic activity of histone deacetylases (HDACs) leads to a histone deacetylation-mediated condensed chromatic structure, resulting in transcriptional repression, which has been implicated in the modifications of neural circuits and behaviors. Repeated treatment with electroconvulsive seizure (ECS) induces changes in histone acetylation, expression of various genes, and intrabrain cellular changes, including neurogenesis. In this study, we examined the effects of repeated ECS on the expression of class I HDACs and related changes in histone modifications and gene expression in the rat frontal cortex. Ten days of repeated ECS treatments (E10X) up-regulated HDAC2 expression at the mRNA and protein levels in the rat frontal cortex compared with sham-treated controls; this was evident in the nuclei of neuronal cells in the prefrontal, cingulate, orbital, and insular cortices. Among the known HDAC2 target genes, mRNA expression of *N*-methyl-D-aspartate (NMDA) receptor signaling-related genes, including early growth response-1 (*Egr1*), *c-Fos*, glutamate receptor, ionotropic, *N*-methyl D-aspartate 2A (*Nr2a*), *Nr2b*, neuritin1 (*Nrn1*), and calcium/calmodulin-dependent protein kinase II alpha (*Camk2a*), were decreased, and the histone acetylation of H3 and/or H4 proteins was also reduced by E10X. Chromatin immunoprecipitation analysis revealed that HDAC2 occupancy in the promoters of down-regulated genes was increased significantly. Moreover, administration of sodium butyrate, a HDAC inhibitor, during the course of E10X ameliorated the ECS-induced down-regulation of genes in the rat frontal cortex. These findings suggest that induction of HDAC2 by repeated ECS treatment could play an important role in the down-regulation of NMDA receptor signaling-related genes in the rat frontal cortex through histone modification.

Received 18 July 2013; Reviewed 6 August 2013; Revised 10 January 2014; Accepted 7 February 2014;

First published online 10 March 2014

**Key words:** ECS, HDAC, histone acetylation, synaptic plasticity genes.

## Introduction

A family of enzymes called histone deacetylases (HDACs) mediate the deacetylation of histone tails, which, through

the enzymatic activity of HDACs, leads to a condensed chromatin structure that results in transcriptional repression (Grozinger and Schreiber, 2002; de Ruijter et al., 2003). Dynamic regulation of histone acetylation

Address for correspondence: Dr S. H. Kim, Institute of Human Behavioral Medicine, Medical Research Center, Seoul National University, 28 Yongon-Dong, Chongno-Gu, Seoul, 110-744, Republic of Korea.

Tel.: +82 -2-2072-1722 Fax: +82-2-744-7241

Email: sh3491@snu.ac.kr

Dr Y. S. Kim, Department of Neuropsychiatry, Dongguk University International Hospital, Dongguk University Medical School, 27 Dongguk-Ro, Ilsandong-gu, Goyang-si, Gyeonggi-do, 410-773, Republic of Korea.

Tel.: +82 -31-961-7239 Fax: +82-31-961-7236

Email: kys@snu.ac.kr

\* These authors contributed equally to this study as corresponding authors.

by the balance between histone acetyltransferases (HATs) and HDACs may affect the expression of a wide variety of genes (Graff and Tsai, 2013). Accumulating evidence suggests that HDACs play important roles in synaptic plasticity, learning, memory, and adult neurogenesis (Levenson and Sweatt, 2005; Tsankova et al., 2007; Abel and Zukin, 2008; Jiang et al., 2008; Sun et al., 2011). There are 18 HDAC enzymes in the mammalian genome, and they are generally divided into four classes: I, II, III, and IV (Yang and Seto, 2008). Although structural homology and common catalytic mechanisms may translate into functional redundancy of HDAC isoenzymes, individual HDACs have different physiological functions (Kramer, 2009). In particular, class I HDACs have been implicated in synaptic plasticity and neuroprotective actions in the brain (Fischer et al., 2007; Nott et al., 2008; Guan et al., 2009).

Recent studies have indicated that changes in histone acetylation and related HDACs are implicated in the pathophysiology of psychiatric disorders and the mechanisms of actions of psychotherapeutic agents (Tsankova et al., 2007; Boks et al., 2012). Valproic acid, a mood stabilizer used in the treatment of bipolar disorder, is a HDAC inhibitor (Gottlicher et al., 2001; Phiel et al., 2001). Altered histone acetylation and related regulatory mechanisms in the post-mortem brains or blood cells of patients with schizophrenia have been reported (Akbarian et al., 2005; Sharma et al., 2006, 2008; Gavin et al., 2009; Tang et al., 2011), and antipsychotics, including clozapine and haloperidol, affect histone acetylation in the brain (Li et al., 2004; Guidotti et al., 2009; Kurita et al., 2012). HDAC2 was induced in the brain by chronic treatment with clozapine (Kurita et al., 2012), and the antidepressant fluoxetine increased expression of HDAC2 in the rat brain (Cassel et al., 2006). HDAC5 has been reported to be involved in the stress-mediated induction of depressive behaviors and antidepressant actions (Tsankova et al., 2006; Renthal et al., 2007). Various antidepressants may induce brain-region-specific changes in expression levels of different HDAC isoforms (Ookubo et al., 2013). Additionally, HDAC inhibitors induce antidepressant-like behavioral changes (Schroeder et al., 2007; Covington et al., 2009).

Electroconvulsive seizure (ECS) is an animal model of electroconvulsive therapy (ECT), which has been used in the treatment of depression as well as bipolar disorder and schizophrenia (Mukherjee et al., 1994; Tharyan and Adams, 2005; Lisanby, 2007). Repeated treatments are required to induce the therapeutic actions of ECT, and repeated ECS treatments have been reported to induce cellular proliferation and neurogenesis, synaptic modifications, increased expression of neurotrophic factors, changes in the activity of intracellular signaling molecules, and anti-apoptotic activity (Merkl et al., 2009). Repeated ECS treatments induce changes in the

expression of various genes in the brain (Newton et al., 2003; Altar et al., 2004; Ploski et al., 2006; Segi-Nishida, 2011), which result in the long-term plastic changes induced by ECS.

Chromatin modifications could play crucial roles in the altered expression of various genes as a result of ECS. Previously, we reported that repeated ECS treatment decreased the expression of early growth response 1 gene (*Egr1*) and *c-Fos*. The inducibility of these genes in response to cocaine was also attenuated, despite the activation of an upstream kinase, extracellular signal-regulated kinase 1/2 (ERK1/2), in the rat frontal cortex (Park et al., 2011). These findings suggest that epigenetic mechanisms blocking the inducibility of these genes could be involved in the attenuated response of immediate early genes (IEGs) to stimuli. In fact, repeated ECS treatments induced down regulation of *c-Fos*, and histone deacetylation in the promoter region of *c-Fos* has been reported (Tsankova et al., 2004). Several studies have also indicated that ECS affects histone modifications in the brain (Crowe et al., 2011; Dyrvig et al., 2012; Fryland et al., 2012). These findings suggest that histone modifications could play important roles in ECS-induced gene expression changes. However, the regulatory mechanism(s) responsible for these histone modifications as yet remain unknown (Fig 1).

In this study, we investigated the effects of repeated ECS treatments on the expression of class I HDACs in the rat frontal cortex, and found that both *Hdac2* mRNA and HDAC2 protein level increased. Among the known HDAC2 target genes (Guan et al., 2009), mRNA expression and promoter histone acetylation of *Egr1*, *c-Fos*, neuritin1 (*Nrn1*), glutamate receptor, ionotropic, N-methyl D-aspartate 2A (*Nr2a*), glutamate receptor, ionotropic, N-methyl D-aspartate 2B (*Nr2b*), and calcium/calmodulin-dependent protein kinase II alpha (*Camk2a*) decreased after repeated ECS treatments. HDAC2 occupancy on their promoters was also increased, and treatment with an HDAC inhibitor recovered the ECS-induced down-regulation of these genes. These findings indicate that HDAC2 may play an important role in the ECS-mediated changes in gene expression in the brain.

## Method

### Animals

Animals were treated in accordance with the National Institute of Health Guide for the Care and Use of Laboratory Animals. Formal approval to conduct this experiment was obtained from the animal subjects review board of Seoul National University Hospital. Male Sprague-Dawley rats (150–200 g) were housed for 1 wk before the experiments and maintained under a strict 12/12 h light/dark cycle (lights on 08:00 hours) with food and water available *ad libitum*.

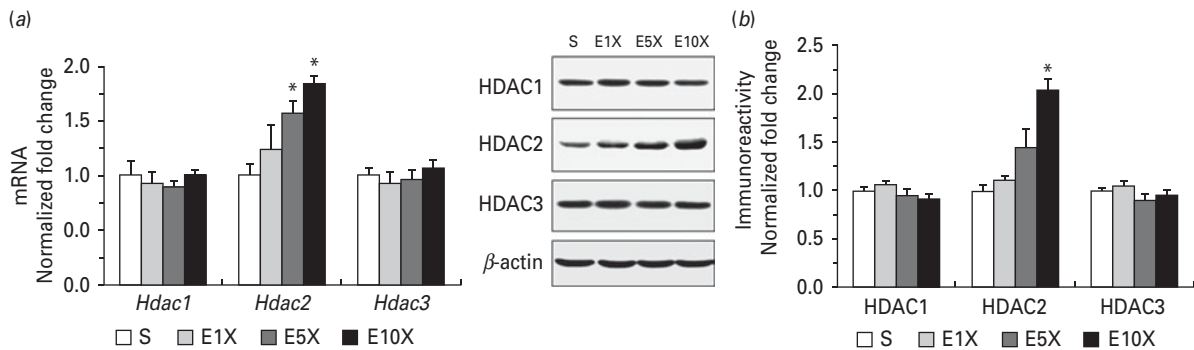

**Fig. 1.** Repeated ECS treatments induce HDAC2 mRNA and protein expression in the rat frontal cortex. (a) mRNA expression of class I *Hdacs* (*Hdac1*, *Hdac2*, and *Hdac3*) was analyzed with qRT-PCR, and values relative to the sham control (S) are presented. The *Hdac2* mRNA level was significantly increased in the rat frontal cortex 24 h after repeated ECS treatments for 5 d (E5X) and for 10 d (E10X). (b) Representative immunoblots and quantified immunoblot values of class I HDACs (HDAC1, HDAC2, and HDAC3) from the rat frontal cortex are presented. HDAC2 immunoreactivity was increased in the rat frontal cortex by E10X. The immunoreactivity value was quantified using a densitometric analysis of band intensity and is presented as relative optical density (OD) vs. the control. Values are presented as means  $\pm$  S.E. \*,  $p < 0.05$  ( $n = 4-8$  for each treatment group).

### ECS and sodium butyrate treatments

ECS was administered to the rats, and an ECS-induced seizure was validated as described previously (Kim et al., 2010). Sham-control animals were handled in the same fashion as the ECS treated group, but no electric current was delivered. Rats were divided into four groups for ECS treatments: sham treatment only for 10 d (S), sham treatment for 9 d then ECS on the 10th day (E1X), sham treatment for 5 d then ECS daily for 5 d (E5X), and ECS daily for 10 d (E10X). All treatments were administered once a day at the same time (12:00–13:00). The rats were decapitated 24 h after the last treatment. For the experiments on the effect of the HDAC inhibitor, 1200 mg/kg of sodium butyrate (NaBu; Sigma-Aldrich, USA) or normal saline vehicle were injected intraperitoneally (i.p.) into rats 30 min before ECS treatment during the last 4 d of E10X and 30 min before decapitation for a total of five times. Then, the frontal cortex was dissected and used for further analyses. The NaBu dose was determined based on previously published studies (Levenson et al., 2004; Fischer et al., 2007; Kim et al., 2011; Stafford et al., 2012). To inhibit ECS-induced HDAC2 activity, NaBu was injected after E5X, when a trend of increase in HDAC2 protein level was observed, for 5 d. The effects of NaBu were confirmed by analyzing histone acetylation and HDAC2 activity as described below.

### Quantitative real-time PCR

Quantitative real-time PCR (qRT-PCR) was performed as described previously (Park et al., 2011). Briefly, total RNA was extracted from the frontal cortex using the TRI reagent (Molecular Research Center, USA). Then, 1  $\mu$ g total RNA was reverse-transcribed to cDNA using the Superscript II RT system (Invitrogen, USA). Quantitative real-time PCR was performed using an ABI PRISM 7500 instrument (Applied Biosystems, USA) with the SYBR Green PCR Real-time PCR Master Mix

(Toyobo, Japan). Relative amounts of all mRNAs were calculated by the comparative Ct method using the  $2^{-\Delta Ct}$  equation. The  $\Delta Ct$  was the difference in the Ct values derived from the target gene and the  $\beta$ -actin control, whereas  $\Delta\Delta Ct$  was calculated by the formula  $\Delta\Delta Ct = \Delta Ct - \Delta Ct$  of the control group (sham or sham of CT8). The primer sequences for quantitative real-time PCR are summarized in Table 1.

### Immunohistochemistry

Immunohistochemistry was performed using a free-floating method. Rats were anesthetized with urethane (1.5 g/kg, i.p.) 24 h after the last ECS treatment and perfused intracardially with 0.1 M PBS (pH 7.4) followed by 4% paraformaldehyde (Sigma-Aldrich) in 0.1 M PBS (pH 7.4). Brains were sectioned at 25  $\mu$ m on a cryostat (Leitz, Germany), then immediately immersed in a cryoprotectant, 50% glycerol in 0.1 M PBS. Immunohistochemistry was performed with the ABC system (Invitrogen). Sections were washed with and incubated in 0.3%  $H_2O_2$  for 30 min to quench endogenous peroxidase activity. After extensive washing with 0.1 M PBS, sections were blocked with 5% normal goat serum at room temperature for 30 min, then incubated overnight with primary antibodies against HDAC2 (Santa Cruz Biotechnology, USA) at a dilution of 1:500 at 4  $^{\circ}$ C. Sections were incubated with biotinylated secondary antibodies and then incubated with HRP-conjugated streptavidin. Signals were detected using DAB substrate. Subsequently, sections were mounted with DPX mountant (Fluka, Switzerland). Images of the prefrontal, orbital, cingulate, and insular cortices were obtained using an Olympus microscope equipped with a Leica DFC280 digital camera and software (Leica Application Suite V3, Germany), and all HDAC2-positive cells in 300  $\times$  400  $\mu$ m areas of each brain region were manually counted for subsequent quantitative analysis.

**Table 1.** Primers for qRT-PCR

|                | Forward (5'–3')         | Reverse (5'–3')          |
|----------------|-------------------------|--------------------------|
| <i>Hdac1</i>   | AGTATAATGTCCCCAGGGACCA  | CTGAAAAGGGGCCCCAGAAG     |
| <i>Hdac2</i>   | CGGCAAGAAGAAAGTGTGCT    | TCCATCGAACACTGGACAGT     |
| <i>Hdac3</i>   | GAGCCTTAATGCCTTCAACG    | AGGTAGAAGGCTTCTGAAC      |
| <i>Egr1</i>    | CTTCGCTCACTCCACTATCC    | GATGAGTTGGGACTGGTAGG     |
| <i>c-Fos</i>   | GGAATTAACCTGGTGCTGGA    | TGAACATGGACGCTGAAGAG     |
| <i>Cdk5r1</i>  | AGGCCACACTGTTTGAGGAT    | AGGCAGTACCGAGATGATGG     |
| <i>Homer1</i>  | AGGCAGCTGAGTCCTTCAGA    | AAACCGTCAAAGACGGACTG     |
| <i>Nrxn1</i>   | GGACGTTTCCTTACGGTTCA    | TCCAGTCGAAGGGTATCTGC     |
| <i>Nrxn3</i>   | CATTGTGGAGCCAGTGAATG    | GATTGTACCTGCCGAAGAT      |
| <i>Cbp</i>     | GCTCCGTCTTTGCTCAACTC    | AACACATGGCTTGGGACTTC     |
| <i>Glur1</i>   | AACCACCGAGGAAGGATACC    | TGAGGCGTTCTGATTACACG     |
| <i>Nrn1</i>    | CTCTACGGATTGCCAGGAA     | TCGAATAAGCTGCCTTGGAT     |
| <i>Nr2a</i>    | GTCTGGAGGACAGCAAGAGG    | TCCCATAACTAAGCGTTGG      |
| <i>Nr2b</i>    | TCCGTCTTCTTATGTGGATATGC | CCTTAGGCGGACAGGATTAAGG   |
| <i>Camk2α</i>  | AGATGTGCGACCTGGAATGAC   | CGGGACCACAGGTTTTCAAAATAG |
| <i>Npy</i>     | AGATACTACTCCGCTCTGCGA   | GGCATTTTCTGTGCTTTCTCT    |
| <i>β-actin</i> | CCTCTGAACCCTAAGGCCAA    | AGCCTGGATGGCTACGTACA     |

### Double-label immunofluorescence

Immunofluorescence was performed as described previously (Kim et al., 2013). The sections were blocked for 1 h with 3% BSA in TBST and then incubated with a specific antibody against HDAC2 (Santa Cruz Biotechnology), with an antibody against neuronal nuclear protein (NeuN; Chemicon, USA), or with an antibody against glial fibrillary acidic protein (GFAP; Chemicon) at 4°C overnight. After washing in TBST, the sections were incubated with secondary antibodies (1:200 for Alexa Fluor 488 and 555, Molecular Probes, USA) for 1 h at room temperature. The sections were then incubated in 4',6'-diamidino-2-phenylindole (DAPI; Sigma-Aldrich) to stain nuclei. After mounting with mountant (Biomed, USA), sections on slides were analyzed using a Meta confocal microscope (Model LSM 510; Carl Zeiss Micro Imaging Inc., Germany).

### Chromatin immunoprecipitation

Chromatin immunoprecipitation (ChIP) assays were performed according to the manufacturer's protocol with the EZ-magna ChIP kit (Millipore, USA) with some modifications. The frontal cortex was minced to ~1 mm-sized pieces in 0.1 M PBS containing protease inhibitors (Sigma-Aldrich), then immediately cross-linked for 15 min at room temperature in 1% paraformaldehyde. The cross-linking reaction was stopped by adding glycine to a final concentration of 0.125 M and incubating for 5 min at room temperature. The minced tissues were collected by centrifugation (800 g, 5 min, 4°C) and washed three times with cold 0.1 M PBS containing protease inhibitors. Then, the tissue was homogenized in cell lysis buffer (10 mM Tris, 10 mM NaCl, and 0.2% NP-40) and incubated for 15 min at 4°C with mild agitation.

The homogenate was centrifuged (800 g, 5 min) to collect nuclei. The nuclear pellet was homogenized in nuclear lysis buffer (1% SDS, 10 mM EDTA, 50 mM Tris-HCl, pH 8.1). Then, the extracted chromatin was sheared to 500–1000 bp using Bioruptor sonicator (Cosmobio, Japan). Each sample was sonicated five times on ice for 30 s periods separated by intervals of 60 s. The optical density of each sample was determined, and equal amounts of chromatin (10–15 µg) were diluted with ChIP dilution buffer containing 0.01% SDS, 1.1% Triton Z-100, 1.2 mM EDTA, 167 mM NaCl, and 16.7 mM Tris-HCl, pH 8.1 to a final volume of 500 µl. Then, 1% of the final volume was saved as input for the later normalization. The chromatin solution was immunoprecipitated overnight at 4°C with 40 µl of protein A magnetic beads (Millipore) and 5 µg of specific antibodies against H3 acetylated at Lys9 and Lys14 (Millipore); H4 acetylated at Lys5, Lys8, Lys12, and Lys16 (Millipore); and HDAC2 (Abcam, USA). As a control, samples were immunoprecipitated with 5 µg of nonimmune rabbit IgG (Millipore). After immunoprecipitation, beads were sequentially washed for 5 min at 4°C with low-salt buffer, high-salt buffer, LiCl buffer, and TE buffer. The immunoprecipitated DNA was then eluted by incubating in 100 µl of Elution buffer (0.1 M NaHCO<sub>3</sub> and 1% SDS) containing 10 µg proteinase K (Sigma-Aldrich) at 62°C for 2 h with rotation. The eluted DNA was purified by using the columns and buffers contained in the kit (Millipore) or using PCR DNA fragment extraction kit (RBC Bioscience, Taiwan) and finally redissolved in 50 µl of PCR-grade water. The levels of specific histone modification and HDAC2 binding at each gene promoter region were determined by qRT-PCR as described above. Primer pairs for specific ~150 bp segments corresponding to each gene promoter region (regions within 500 bp



**Table 2.** Primers for ChIP-qRT-PCR

| Genes         | Forward (5'–3')        | Reverse (5'–3')          |
|---------------|------------------------|--------------------------|
| <i>Egr1</i>   | ACCACCCAACATCAGCTCTC   | GTGGGTGAGTGAGGAAAGGA     |
| <i>c-Fos</i>  | TTCTCTGTTCCGCTCATGACGT | CTTCTCAGTTGCTAGCTGCAATCG |
| <i>Nrn1</i>   | AAAATCAATCCGTGTCATCC   | GAGCTGGGAATGGTTCACCTC    |
| <i>Nr2a</i>   | GGCTGGATGAGGTCTGAGAG   | CGCAGCCTCTCTCCACATAG     |
| <i>Nr2b</i>   | ATGCTCTACGGAGGGACAGA   | TCTTCAGCAATTACAGATTGGA   |
| <i>Camk2a</i> | AGCTCGTCAATCAAGCTGGT   | GGACTAGGACTGGGATGCTG     |
| <i>Npy</i>    | CAGTGTCTGGTCCCTACAGA   | CTGAGAGGAGAAGGGAACAT     |
| <i>Gapdh</i>  | AGCAGCTTTCTGTTTCTGG    | ATGAGGGTTCCTCAGGATAGG    |

upstream from the transcription starting site) were used, which were based on methods used in previous related reports (Tsankova et al., 2004; Freeman et al., 2008). The primers could reflect the proximal promoter region within 500 bp upstream from the transcription start site. Relative quantification of the template was performed as described previously (Chakrabarti et al., 2002). Average Ct values ( $^{\text{average}}$ Ct of IP) were obtained by averaging triplicate measurements for each sample, and the  $^{\text{net}}$ Ct was calculated by subtracting  $^{\text{average}}$ Ct of the input from  $^{\text{average}}$ Ct of IP. The  $^{\text{net}}$ Ct of each gene was normalized ( $^{\text{norm-net}}$ Ct) with  $^{\text{net}}$ Ct of Gapdh by subtracting  $^{\text{net}}$ Ct of IP from  $^{\text{net}}$ Ct of GAPDH in histone modification experiments. The  $^{\text{net}}$ Ct of each gene was normalized ( $^{\text{norm-net}}$ Ct) with  $^{\text{net}}$ Ct of IgG by subtracting  $^{\text{net}}$ Ct of IP from  $^{\text{net}}$ Ct of IgG in HDAC2 binding experiments. The relative amount of each sample was determined by raising 2 to the  $^{\text{norm-net}}$ Ct power. Primer sequences for ChIP-qRT-PCR are summarized in Table 2.

### Histone extraction

Frontal cortex tissues were homogenized in ice-cold lysis buffer (pH 7.4) containing 10 mM Tris-HCl, 5 mM NaF, 1 mM  $\text{Na}_3\text{VO}_4$ , 1 mM EDTA, 1 mM EGTA, and 320 mM sucrose, and then the homogenates were centrifuged (800 g, 10 min, 4 °C). Pelleted nuclei were resuspended in 500  $\mu\text{l}$  of 0.4 N  $\text{H}_2\text{SO}_4$  and incubated on ice for 30 min and then centrifuged (14000 g, 10 min, 4 °C). The supernatant was transferred to a fresh tube, and proteins were precipitated with 250  $\mu\text{l}$  of 100% trichloroacetic acid (final concentration of 33%) containing 4 mg/ml deoxycholic acid (Sigma-Aldrich) on ice for 30 min. The protein pellet was washed with ice-cold acidified acetone (0.1% HCl) followed by ice-cold acetone for 5 min each. Protein precipitates were collected between washes by centrifugation (14000 g, 5 min). The resulting purified proteins were resuspended in 10 mM Tris (pH 8.0). Protein concentrations were determined using the Bio-Rad protein assay reagent (Bio-Rad, USA). To assess histone post-translational modifications, 1  $\mu\text{g}$  of histone extracts was separated by SDS-PAGE on a 12% resolving and 4% stacking gel.

The rest of the procedures followed the immunoblot analysis procedure.

### Immunoblot analysis

Immunoblot analyses were performed as described previously (Kim et al., 2008, 2013). Antibodies against HDAC1, HDAC2, HDAC3 (Abcam), and  $\beta$ -actin (Sigma-Aldrich) were used at dilutions of 1:1000 to 1:5000. For histone modification analysis, antibodies against ac-Lys9/14-H3, ac-Lys-H4 (Millipore), H3, and H4 (Cell signaling Technology, USA) were used. Blots were incubated with primary antibody overnight at 4 °C. Subsequently, the membranes were incubated with HRP-conjugated secondary antibody (Zymed Laboratories, USA), and the signals were detected using an enhanced chemiluminescence system (Pierce, USA). Immunoblot signals were quantified with the TINA program (v.2.10 g; Raytest, Germany). At least four independent experiments were performed.

### HDAC2 activity assay

An HDAC2 activity assay was performed using an HDAC2 activity fluorometric assay kit (Biovision, USA) according to the manufacturer's instructions and previous reports (Marwick et al., 2004; Huang et al., 2012a). In brief, HDAC2 was immunoprecipitated from the frontal cortex extract by incubation with an HDAC2-specific antibody at 4 °C overnight. Each tissue extract was incubated with rabbit IgG as a negative control and background control. After incubation, the antibody-HDAC2 complex was captured by incubation with a protein-A/G slurry for 1 h at 4 °C. For the HDAC2 activity assay, the precipitated HDAC2 was incubated in HDAC assay buffer containing HDAC substrate at 37 °C for 1 h. Then the developer was added to the reaction mixtures and the mixtures were incubated at 37 °C for 30 min. To measure HDAC2 activity, AFC (7-amino-4-trifluoromethyl coumarin) was used as a standard. After final incubation, the reaction mixtures and AFC standard were transferred to a 96-well black opaque plate and the fluorescence was read using Spectramax M5 (Molecular Devices, USA).

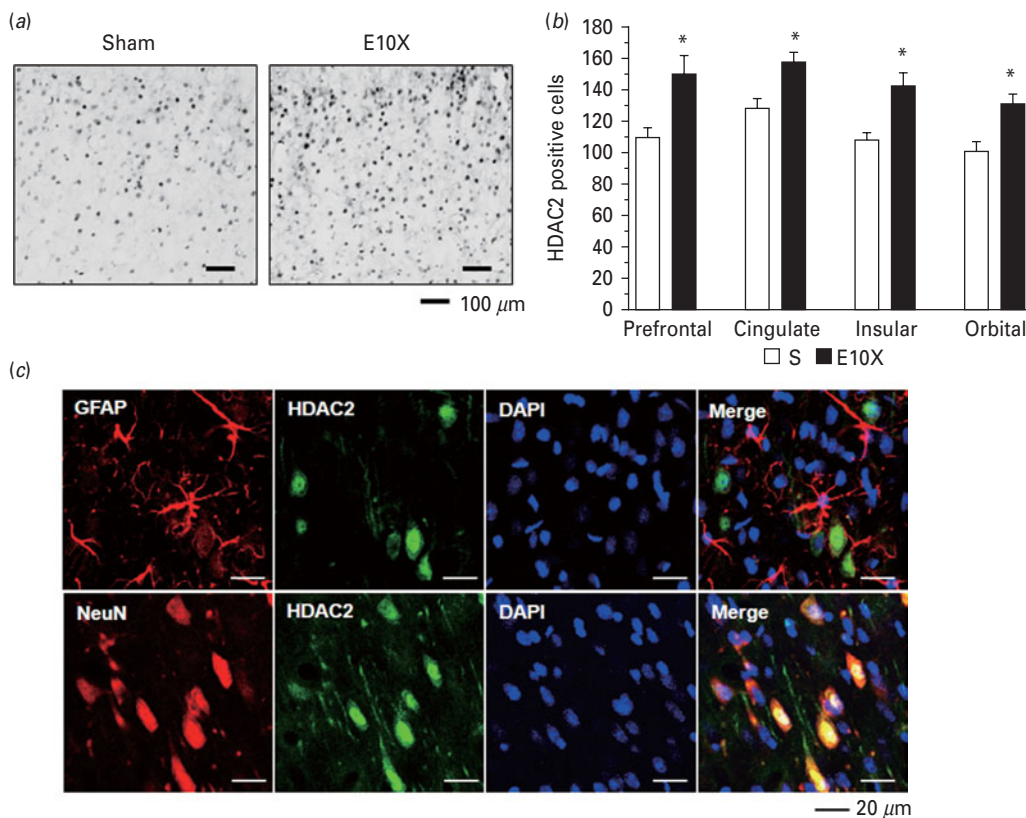

**Fig. 2.** Increased immunostaining for HDAC2 co-localized with immunofluorescence of Neu-N in the rat frontal cortex after repeated ECS treatments. (a) Representative microscopic images taken from sections stained for HDAC2 in the rat prefrontal cortex (Fr) (Paxinos and Watson, 1998). All captured images were obtained 24 h after the last of 10 daily ECS treatments (E10X). (b) The number of positive cells for HDAC2 was counted and was found to be increased in prefrontal (Fr), cingulate (Cg), insular (AI), and orbital (LO and VLO) cortical regions (Paxinos and Watson, 1998) after E10X. Values are presented as means  $\pm$  s.e. \*,  $p < 0.05$  ( $n = 4$  for each treatment group). (c) Immunofluorescence of HDAC2 was co-localized with that of Neu-N (red) and DAPI (blue) in the rat prefrontal cortex (Fr) (Paxinos and Watson, 1998). Magnification bar = 100 (a) and 20  $\mu$ m (c).

### Statistical analyses

Immunoblot results are expressed as relative optical density units (ODs), and results of qRT-PCR, ChIP-qRT-PCR, and the HDAC2 activity assay are expressed as fold changes relative to controls. All results are presented as means  $\pm$  s.e. The mean relative ODs of immunoreactivity and fold changes were compared with the control using an independent *t*-test or one-way analysis of variance (ANOVA), followed by a *post-hoc* LSD test. All tests were performed using the SPSS software (v.19.0 for Windows; SPSS, Inc., USA).  $p$  values  $< 0.05$  were deemed to indicate statistical significance.

### Results

#### Repeated ECS treatments induce HDAC2 expression in the rat frontal cortex

Expression changes of class I HDACs after ECS treatments in the rat frontal cortex were investigated. Class I HDACs consist of HDAC1, 2, 3, and 8. Among them, HDAC8 has been reported to be barely expressed in the rat cerebral cortex (Broide et al., 2007). We also found

that *Hdac8* mRNA was barely detectable in the rat frontal cortex (data not shown). The *Hdac2* mRNA level was significantly affected by ECS treatments ( $F = 9.434$ ,  $p < 0.001$ ): *Hdac2* mRNA level was significantly increased by E5X ( $p = 0.002$ ) and E10X ( $p < 0.001$ ). However, the mRNA levels of *Hdac1* and *Hdac3* were not changed by ECS treatments. The protein level of HDAC2 was also significantly affected by ECS treatments ( $F = 4.962$ ,  $p = 0.038$ ), in that E5X induced a trend toward an increase ( $p = 0.073$ ) and E10X induced a significant increase ( $p = 0.016$ ) in HDAC2 protein levels. HDAC1 and HDAC3 protein levels were not significantly affected by ECS treatments. Taken together, these results indicate that repeated ECS treatments induce an increase in HDAC2 levels in the rat frontal cortex.

#### Increased HDAC2 immunoreactivity after E10X was localized in the nucleus of neurons in the rat frontal cortex.

To investigate the detailed anatomical localization of HDAC2-positive cells within the frontal cortical regions after E10X, an immunohistochemical analysis was

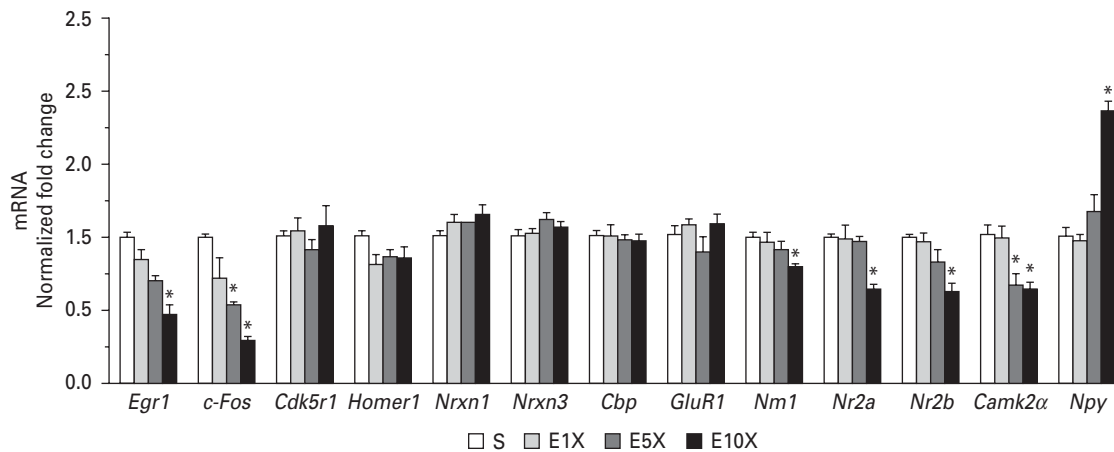

**Fig. 3.** Effects of ECS treatments on mRNA expression of HDAC2-regulated genes in the rat frontal cortex. mRNA expression levels of genes regulated by HDAC2, including *Egr1*, *c-Fos*, cyclin-dependent kinase 5, regulatory subunit 1 (*Cdk5r1*), *Homer1*, neurexin1 (*Nrnx1*), neurexin3 (*Nrnx3*), CREB binding protein (*Cbp*), glutamate receptor, ionotropic, AMPA 1 (*Glur1*), *Nrn1*, *Nr2a*, *Nr2b*, and *Camk2a* and of *Npy* were analyzed with qRT-PCR, and values relative to the sham control (S) are presented. mRNA levels of *c-Fos* and *Camk2a* were significantly reduced 24 h after repeated ECS treatments for 5 d (E5X). mRNA levels of *Egr1*, *c-Fos*, *Nrn1*, *Nr2a*, *Nr2b*, and *Camk2a* were significantly reduced 24 h after repeated ECS treatments for 10 d (E10X). E10X induced a significant increase in the mRNA level of *Npy*. Values are presented as means  $\pm$  s.e. \*,  $p < 0.05$  ( $n = 4-8$  for each treatment group).

performed. The density of HDAC2-positive neurons was increased in the prefrontal cortex after E10X (Fig. 2a). HDAC2-positive cells were increased significantly in E10X-treated animals in the prefrontal (Fr;  $t = 2.917$ ,  $p = 0.027$ ), cingulate (Cg;  $t = 3.385$ ,  $p = 0.015$ ), insular (AI;  $t = 3.611$ ,  $p = 0.011$ ), and orbital (LO and VLO;  $t = 3.770$ ,  $p = 0.009$ ) cortices (Paxinos and Watson, 1998) (Fig. 2b).

Immunofluorescence analysis was performed. Immunoreactivity of HDAC2 was co-localized with Neu-N, a specific neuronal protein (Mullen et al., 1992), but not with GFAP, a marker for glial cells (Raff et al., 1979). Additionally, HDAC2 immunoreactivity was co-localized with DAPI reactivity, a fluorescence stain labeling cell nuclei through binding to DNA (Kubista et al., 1987) (Fig. 2c). E10X increased the HDAC2 immunoreactivity in the nucleus of the neurons in rat cortical regions, including the prefrontal, cingulate, orbital, and insular cortices.

Repeated ECS treatments reduced *Egr1*, *c-Fos*, *Nrn1*, *Nr2a*, *Nr2b*, and *Camk2a* mRNA expression in the rat frontal cortex.

The mRNA expression levels of genes reportedly regulated by HDAC2 (Guan et al., 2009) including *Egr1*, *c-Fos*, cyclin-dependent kinase 5, regulatory subunit 1 (*Cdk5r1*), *Homer1*, neurexin1 (*Nrnx1*), neurexin3 (*Nrnx3*), CREB binding protein (*Cbp*), glutamate receptor, ionotropic, AMPA 1 (*Glur1*), *Nrn1*, *Nr2a*, *Nr2b*, and *Camk2a* were investigated by qRT-PCR. We selected 11 genes that Guan et al. (2009) reported were implicated in synaptic remodeling/plasticity or were regulated by neuronal activity among genes with a more selective association with HDAC2 than with HDAC1. As a control experiment, mRNA expression of *Npy*, which is known to be induced

by repeated ECS treatments (Mikkelsen et al., 1994), was also examined. The mRNA levels of *Egr1* ( $F = 7.774$ ,  $p = 0.001$ ), *c-Fos* ( $F = 10.609$ ,  $p < 0.001$ ), *Nrn1* ( $F = 8.897$ ,  $p < 0.001$ ), *Nr2a* ( $F = 10.708$ ,  $p < 0.001$ ), *Nr2b* ( $F = 6.428$ ,  $p = 0.003$ ), *Camk2a* ( $F = 8.891$ ,  $p = 0.001$ ), and *Npy* ( $F = 28.819$ ,  $p < 0.001$ ) were significantly modified after ECS treatments. The mRNA expression levels of *c-Fos* ( $p = 0.029$ ) and *Camk2a* ( $p = 0.006$ ) were reduced by E5X. The mRNA level of *Egr1* ( $p < 0.001$ ) was reduced in the E10X group, as reported previously (Park et al., 2011). The mRNA levels of *c-Fos* ( $p < 0.001$ ), *Nrn1* ( $p < 0.001$ ), *Nr2a* ( $p < 0.001$ ), *Nr2b* ( $p < 0.001$ ), and *Camk2a* ( $p = 0.001$ ) were reduced by E10X. The *Npy* mRNA level was significantly increased by E10X ( $p < 0.001$ ). The mRNA levels of *Cdk5r1*, *Homer1*, *Nrnx1*, *Nrnx3*, *Cbp*, and *Glur1* were not significantly altered (Fig. 3).

#### Reduced histone acetylation in promoter regions of HDAC2-regulated genes

We investigated histone acetylation in the promoter regions of the genes showing reduced expression with E10X using a ChIP assay followed by qRT-PCR. The acetylation of histone H3 ( $t = 4.540$ ,  $p = 0.002$ ) and H4 ( $t = 2.384$ ,  $p = 0.044$ ) was reduced at the *Egr1* promoter. At the promoter regions of *c-Fos*, *Nrn1*, *Nr2a*, and *Nr2b*, histone H4 acetylation, but not H3 acetylation, was reduced significantly ( $t = 8.849$ ,  $p < 0.001$ ;  $t = 4.158$ ,  $p = 0.006$ ;  $t = 11.680$ ,  $p < 0.001$ ;  $t = 9.615$ ,  $p < 0.001$ , respectively). At the *Camk2a* promoter region, the histone H3 acetylation level was decreased ( $t = 5.092$ ,  $p = 0.002$ ). Acetylation of H3 and H4 at the promoter region of *Npy* was increased significantly ( $t = 4.127$ ,  $p = 0.005$ ;  $t = 6.965$ ,  $p < 0.001$ ; Fig. 4a).

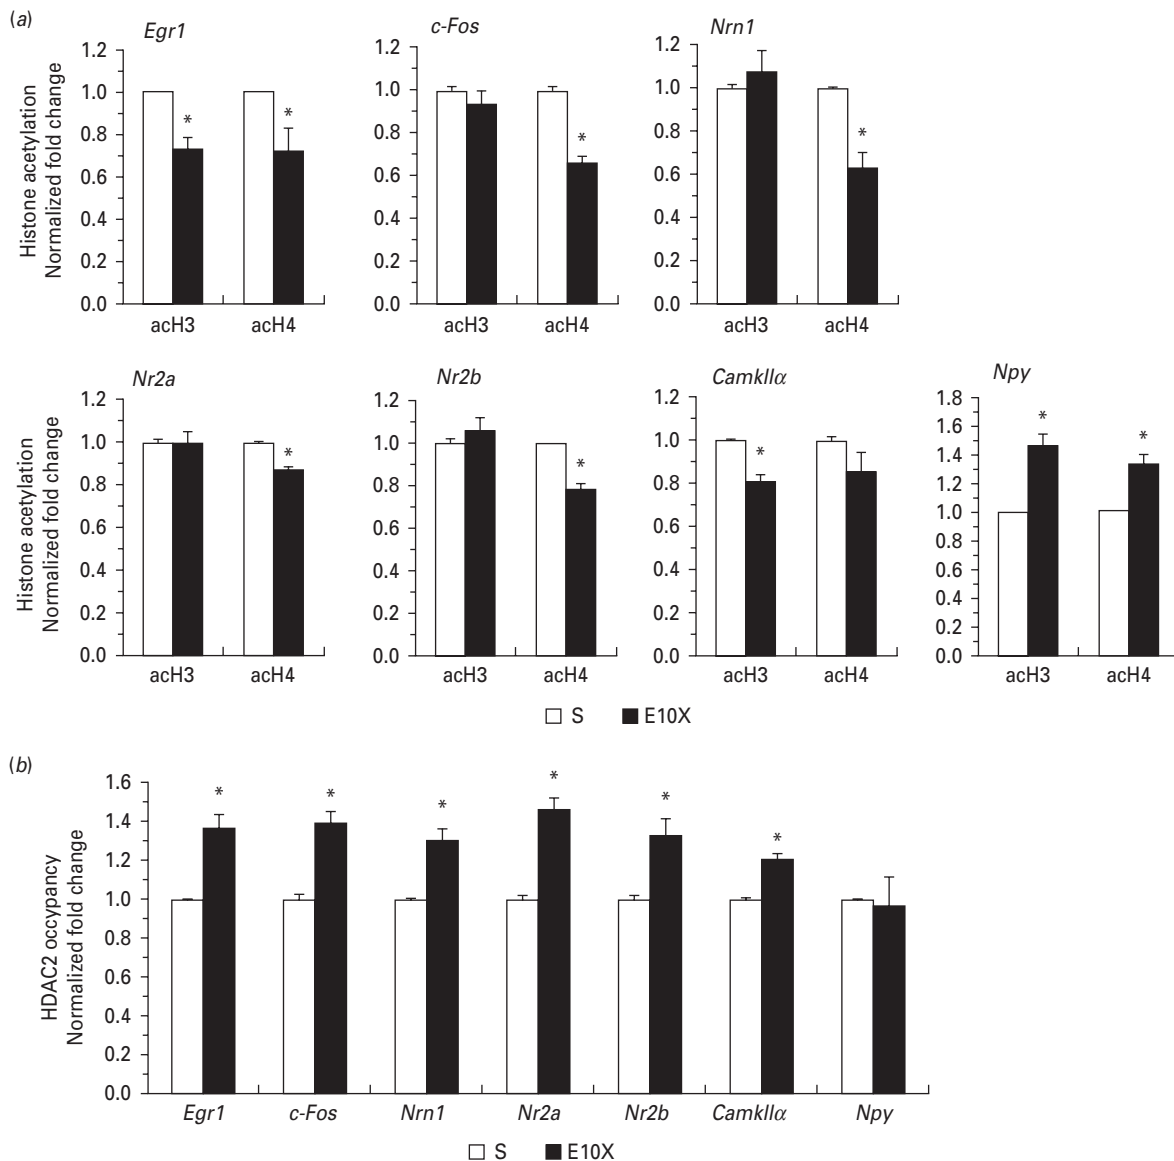

**Fig. 4.** Reduced histone acetylation and increased HDAC2 occupancy in the promoter regions of *Egr1*, *c-Fos*, *Nrn1*, *Nr2a*, *Nr2b*, and *Camk2a* in the rat frontal cortex after repeated ECS treatments. (a) Histone acetylation at the promoter regions of *Egr1*, *c-Fos*, *Nrn1*, *Nr2a*, *Nr2b*, *Camk2a*, and *Npy* was analyzed with a ChIP assay followed by qRT-PCR, and values relative to the sham control (S) are presented. Repeated ECS treatments for 10 d (E10X) reduced H3 acetylation of *Egr1* and *Camk2a* genes and H4 acetylation of *Egr1*, *c-Fos*, *Nrn1*, *Nr2a*, and *Nr2b* genes in the rat frontal cortex. In contrast, acetylation of H3 and H4 was increased in the *Npy* gene. (b) Binding of HDAC2 at the promoter regions of *Egr1*, *c-Fos*, *Nrn1*, *Nr2a*, *Nr2b*, *Camk2a*, and *Npy* was analyzed with ChIP assay followed by qRT-PCR, and values relative to the sham control (S) are presented. E10X induced increased occupancy of HDAC2 at the promoter regions of *Egr1*, *c-Fos*, *Nrn1*, *Nr2a*, *Nr2b*, and *Camk2a* genes. \*,  $p < 0.05$  ( $n = 4$  for each treatment group).

#### Increased binding of HDAC2 to the promoter regions of ECS-reduced genes in the rat frontal cortex

We investigated whether the increased expression of HDAC2 was related to the E10X-induced down-regulation of expression and histone acetylation of the genes examined. The occupancy of HDAC2 at the promoter regions of the genes was examined by ChIP followed by qRT-PCR. HDAC2 binding was increased in the promoter regions of *Egr1* ( $t = 3.533$ ,  $p = 0.012$ ), *c-Fos* ( $t = 5.212$ ,  $p = 0.002$ ), *Nrn1* ( $t = 3.450$ ,  $p = 0.014$ ), *Nr2a* ( $t = 4.123$ ,  $p = 0.018$ ), *Nr2b* ( $t = 5.552$ ,  $p = 0.001$ ), and *Camk2a*

( $t = 7.902$ ,  $p < 0.001$ ) after E10X. However, HDAC2 occupancy in the *Npy* promoter was unaffected by E10X (Fig. 4b).

#### Treatment with sodium butyrate, a HDAC inhibitor, restores ECS-induced down-regulation of HDAC2-related gene expression

To investigate whether HDAC2 enrichment at the promoter regions of genes down-regulated by ECS was functionally significant, the effect of NaBu, which predominantly inhibits class I HDACs (Haggarty and



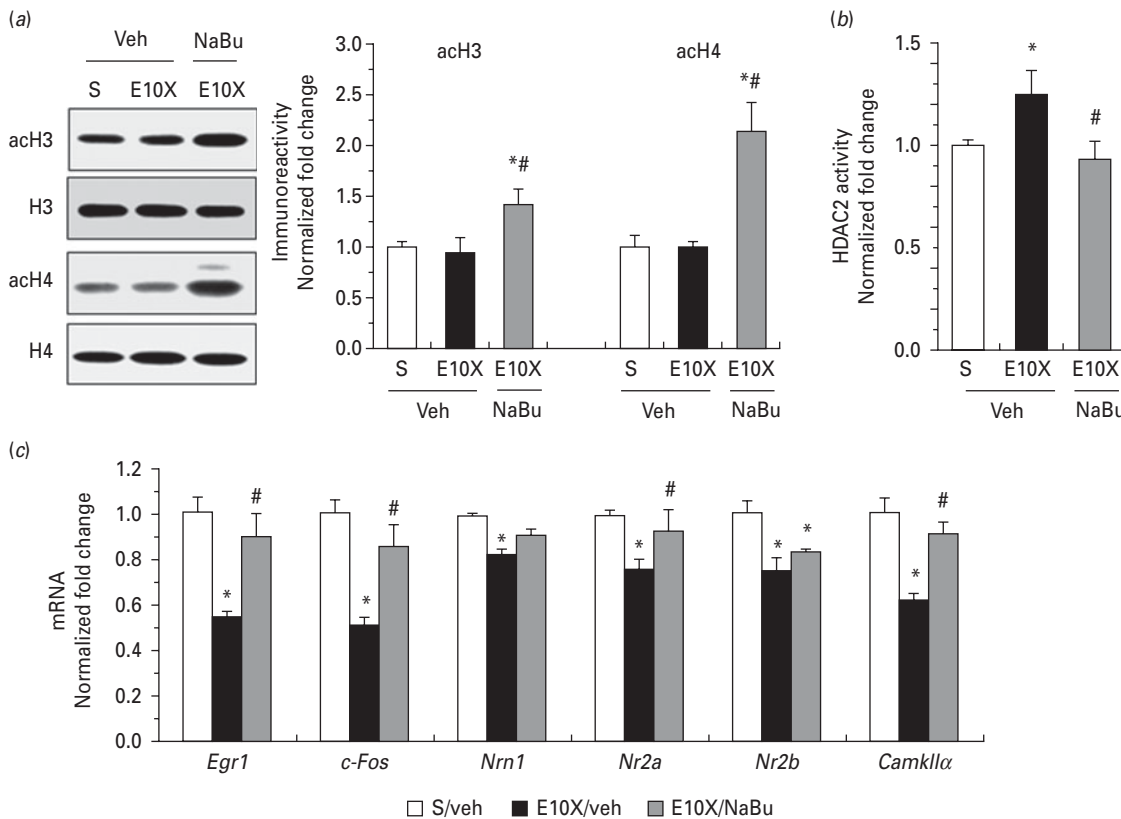

**Fig. 5.** Administration of sodium butyrate restores ECS-induced downregulation of gene expression in the rat frontal cortex. (a) Global histone acetylation levels of H3 and H4 in the rat frontal cortex were analyzed after 5 d of once-daily i.p. injections of NaBu (1200 mg/kg), and quantified immunoblot values are presented. NaBu treatment induced a significant increase in the acetylation of H3 and H4 in the rat frontal cortex. (b) HDAC2 activity in the rat frontal cortex was analyzed, and relative activity values are presented. NaBu treatment significantly reduced the E10X-induced increase in HDAC2 activity. (c) mRNA expression levels of *Egr1*, *c-Fos*, *Nrn1*, *Nr2a*, *Nr2b*, and *CamkIIα* after repeated ECS treatment and NaBu were analyzed with qRT-PCR, and values relative to the sham/vehicle control (S/veh) are presented. mRNA levels of *Egr1*, *c-Fos*, *Nr2a*, and *CamkIIα* in the E10X/NaBu group were significantly higher than those in the E10X/veh group, and the mRNA level of *Nrn1* in the E10X/NaBu group was not significantly lower than that in the S/veh group. \*,  $p < 0.05$ , compared with S/veh group; #,  $p < 0.05$ , compared with E10X/veh group ( $n = 5$  or 6 for each treatment group).

Tsai, 2011), on the reduced expression of HDAC2 target genes was examined. NaBu was injected once per day for 5 d. First, the effect of NaBu on global histone acetylation and on HDAC2 activity in the rat frontal cortex was examined to confirm the efficacy of the NaBu injection. Systemic injection of NaBu significantly affected the acetylation level of H3 ( $F = 5.482$ ,  $p = 0.038$ ) and H4 ( $F = 6.269$ ,  $p = 0.020$ ) in the rat frontal cortex. The acetylation levels of H3 and H4 in the E10X/NaBu group were significantly higher than were those in the E10X/veh group ( $p = 0.022$  and  $0.038$ , respectively) and in the S/veh group ( $p = 0.018$  and  $0.017$ , respectively; Fig. 5a). In addition, systemic injection of NaBu significantly affected HDAC2 activity in the rat frontal cortex ( $F = 4.940$ ,  $p = 0.024$ ). HDAC2 activity was significantly greater in the E10X/veh group than in the S/veh group ( $p = 0.025$ ), while HDAC2 activity was significantly lower in the E10X/NaBu group than in the E10X/veh group ( $p = 0.011$ ) (Fig. 5b). These findings indicate that HDAC2 activity was increased in the rat frontal cortex by E10X,

which was efficiently inhibited by systemic NaBu treatments. Reduced mRNA expression of *Egr1*, *c-Fos*, *Nrn1*, *Nr2a*, and *Camk2α* by E10X (E10X/veh) compared with the sham control group (S/veh) was not evident with NaBu pretreatment before ECS (E10X/NaBu) in the rat frontal cortex. mRNA expression levels of *Egr1* ( $F = 7.533$ ,  $p = 0.010$ ), *c-Fos* ( $F = 9.109$ ,  $p = 0.034$ ), *Nr2a* ( $F = 12.800$ ,  $p = 0.040$ ), and *Camk2α* ( $F = 11.256$ ,  $p = 0.004$ ) in the E10X/NaBu group were significantly higher than in the E10X/veh group. The reduced mRNA expression of *Nr2b* due to E10X was not significantly recovered by NaBu treatment. Down-regulated gene expression, except *Nr2b*, due to E10X was demonstrated to recover with co-administration of NaBu.

## Discussion

Repeated ECS treatment was demonstrated to up-regulate the expression level of HDAC2, a class I HDAC, in the nuclei of neurons in the rat frontal cortical

regions. Expression levels of HDAC2 target genes in the brain (Guan et al., 2009) were examined. Repeated ECS treatments reduced the mRNA levels of *Egr1*, *c-Fos*, *Nrn1*, *Nr2a*, *Nr2b*, and *Camk2a*, which are major components of N-methyl-D-aspartate (NMDA) receptor-related signaling. In the promoter regions of these genes, the histone acetylation levels of H3 and/or H4 were decreased and HDAC2 occupancy was increased by repeated ECS treatments. Administration of NaBu, an HDAC inhibitor, recovered the reduced expression of *Egr1*, *c-Fos*, *Nrn1*, *Nr2a*, and *Camk2a* due to repeated ECS treatments. These findings suggest that repeated ECS treatments resulted in reduced expression of NMDA receptor signaling-related genes through histone deacetylation at the promoter regions via ECS-induced HDAC2 in the rat frontal cortex.

We previously found that repeated ECS treatments down-regulated the expression and inducibility of *Egr1* and *c-Fos* in the rat frontal cortex (Park et al., 2011). In this study, histone acetylation at the promoters of *Egr1* and *c-Fos* was demonstrated to be reduced by E10X. These findings could provide an explanation for the reduced expression and inducibility of the IEGs, *c-Fos* and *Egr1*, by E10X, insofar as histone deacetylation-related chromatin condensation could repress stimulus-responsive gene transcription. Reduced expression and histone deacetylation of *c-Fos* in the rat hippocampus with repeated ECS treatments has been reported previously (Tsankova et al., 2004), which is consistent with the present findings in the frontal cortex.

Among class I HDACs, HDAC2 was increased in the rat frontal cortex by repeated ECS treatments. Histone acetylation of *Egr1* was reduced, and the occupancy of HDAC2 in the *Egr1* gene promoter was increased in the E10X group. These results are consistent with a previous report of a decreased number of *Egr1*-positive neurons in HDAC2 over-expressing mice, and the opposite observation in *Hdac2* knockout mice (Guan et al., 2009). mRNA levels of *c-Fos*, *Nrn1*, *Nr2a*, *Nr2b*, and *Camk2a*, target genes of HDAC2 in the brain (Guan et al., 2009), were also reduced, accompanied by histone deacetylation and increased HDAC2 occupancy at their promoters, by E10X. The reduced mRNA levels of *Egr1*, *c-Fos*, *Nrn1*, *Nr2a*, *Nr2b*, and *Camk2a* were not evident after E1X, when the HDAC2 level was not increased. These findings suggest that HDAC2 could be involved in the down-regulation of these genes in response to repeated ECS treatments.

Among the genes showing reduced expression with E10X, NaBu treatment restored the mRNA expression levels of *Egr1*, *c-Fos*, *Nrn1*, *Nr2a*, and *CaMKIIa*. Among four major classes of HDAC inhibitors, NaBu belongs to the first class of HDAC inhibitors, which predominantly inhibit class I HDACs (Haggarty and Tsai, 2011). Although NaBu also inhibits class IIa HDACs (Carew et al., 2008), class IIa HDACs are likely to act through non-histone substrates, because they have low basal

HDAC activity (Lahm et al., 2007). Decreased histone acetylation and increased binding of HDAC2 at the promoters of the genes showing reduced expression suggest a possible role for HDAC2 in down-regulating the expression of the genes. The decreased mRNA expression of the genes and the increased HDAC2 activity by E10X were reversed by NaBu treatment. These findings suggest that involvement of HDAC2 may play an important role in the ECS-induced down-regulation of gene expression. However, reduced *Nr2b* expression was not recovered by NaBu treatment. Other epigenetic mechanisms, including DNA methylation or other histone modifications, are presumably involved, but this requires further clarification. For example, ECS induces an increase in DNA methylation of the *Arc* gene promoter, which could suppress *Arc* expression (Dyrvig et al., 2012). In addition, transcriptional activity can be regulated by epigenetic changes in the distal promoter region (Coskun et al., 2012). In the current study, we only examined the proximal promoter regions of the genes. Further studies to examine the possible involvement of other epigenetic mechanisms and distal promoters are required for clarification.

HDAC2 affects synaptic transmission in neurons and is involved in the molecular machinery regulating the differentiation and integration of neurons (Akhtar et al., 2009; Montgomery et al., 2009). HDAC2 is involved in modulating synaptic plasticity and long-lasting changes in neural circuits through binding to synaptic plasticity-related genes (Guan et al., 2009). Repeated ECS treatments down-regulated the expression levels of *Egr1*, *c-Fos*, *Nrn1*, *Nr2a*, and *Camk2a*, which are involved in NMDA receptor-mediated synaptic plasticity. *Nr2a* and *Nr2b* genes encode subunits of ionotropic NMDA receptor (Goebel and Poesch, 1999). CaMKII $\alpha$  protein is abundantly expressed in the postsynaptic density, and CaMKII $\alpha$ , bound to NMDA receptors, plays important roles in mediating long-term potentiation (LTP) (Bayer et al., 2001; Hudmon and Schulman, 2002; Lisman et al., 2002; Sanhueza et al., 2011). *Nrn1* encodes neuritin 1 protein, which plays critical roles in dendritic outgrowth, maturation, and axonal regeneration (Naeve et al., 1997; Nedivi et al., 1998; Fujino et al., 2008; Karamoysoyli et al., 2008). *Nrn1* expression can be induced by neural activity and neurotrophins (Naeve et al., 1997; Nedivi et al., 1998). *Nrn1* is induced by calcium influx through NMDA receptors, which is involved in an activity-regulated transcriptional program that induces long-term changes in synaptic connections (Fujino et al., 2003, 2008). *Egr1* and *c-Fos*, as IEGs, are induced by changes in neural activity subsequent to NMDA receptor activation (Beckmann and Wilce, 1997; Guzowski et al., 2001; Mokin and Keifer, 2005). The reduced expression of NMDA receptor-related genes by repeated ECS treatments might be related to a reduced response to neuronal excitability.

The clinical effects of ECT are exerted, at least partly, by reduced neural excitability and modified synaptic

plasticity (Kato, 2009). Repeated ECS treatments induce anti-convulsive properties, which have been suggested to play important roles in the therapeutic mechanism(s) of ECT (Caplan, 1946; Sackeim et al., 1983; Post et al., 1984; Sackeim, 1999). Down-regulation of genes in the NMDA receptor signaling pathway by ECS-induced HDAC2 might be related to reduced neural excitability and the anti-convulsive actions of repeated ECS treatments. A significant increase in HDAC2 expression in an experimental animal model of temporal lobe epilepsy (TLE) and in the brains of patients with TLE has been reported, and this was suggested to be an adaptive change in response to repeated seizures (Huang et al., 2012b). HDAC2 was increased after repeated ECS treatments, but not after a single treatment. Taken together, these results indicate that increased HDAC2 could be involved in the chronic adaptive changes induced by repeated ECS treatments. Transcription factors regulating the expression of *Hdac2* include  $\beta$ -catenin, avian myelocytomatosis viral oncogene homolog (Myc), activator protein 2 (AP2), and lymphoid enhancer factor 4 (LEF4) (Zhu et al., 2004; Zimmermann et al., 2007; Kramer, 2009). Recently, the involvement of serotonin 5-HT<sub>2A</sub> receptor in the up-regulation of *Hdac2* expression in mouse frontal cortex was reported (Kurita et al., 2012). Further investigations are required to understand the roles and implications of HDAC2 induction in the mechanisms of action of ECS.

Antidepressants and antipsychotics have been reported to induce changes in the expression of HDACs in the brain. Repeated treatment with fluoxetine was reported to increase *Hdac2* mRNA expression in the rat striatum and hippocampus (Cassel et al., 2006). Antidepressant treatments, including clomipramine, escitalopram, duloxetine, and mirtazapine, result in region-specific induction of various HDAC isoforms, including HDAC2, HDAC3, and HDAC5, in the brains of mice (Ookubo et al., 2013). In the report of Kurita et al. (2012), the atypical antipsychotic agent clozapine increased HDAC2 expression in the mouse frontal cortex and in the post-mortem human brain of schizophrenic subjects. HDAC2 reduces transcription of metabotropic glutamate 2 receptor (mGlu2), which has been demonstrated to limit the therapeutic effects of antipsychotics. Further clarification is required to determine whether repeated ECS treatment-induced HDAC2 facilitates or limits the therapeutic effects of ECS as an adaptive response to repeated seizures.

In summary, repeated ECS treatments induced HDAC2, one of the class I HDACs, in the rat frontal cortex. Transcription and promoter histone acetylation of *Egr1*, *c-Fos*, *Nrn1*, *Nr2a*, *Nr2b*, and *Camk2a* genes were reduced, and HDAC2 occupancy on the promoters of these genes was increased. Moreover, administration of the HDAC inhibitor NaBu restored the repeated ECS-induced reduced gene expression. These findings suggest that repeated ECS treatment could down-regulate

the genes involved in the NMDA receptor signaling pathway through HDAC2 induction. Further studies are required to understand the role of HDAC2 induction in the therapeutic and adverse effects of ECS.

## Acknowledgments

This study was supported by a grant of the Korea Healthcare Technology R&D Project, Ministry for Health & Welfare (HI12C14700000), and by a grant of the Seoul National University Hospital (04-2009-0870), Republic of Korea.

## Statement of Interest

There is no actual or potential conflict of interest in relation to this article. Y.M. Ahn declares that he has received research grants from, or served as a lecturer for, Janssen, Otsuka, and Lundbeck. Y.S. Kim declares that he has received grants, research support, and/or honoraria from Novartis, Janssen, Otsuka, and AstraZeneca. The present study was not related to any of these professional relationships.

## References

- Abel T, Zukin RS (2008) Epigenetic targets of HDAC inhibition in neurodegenerative and psychiatric disorders. *Curr Opin Pharmacol* 8:57–64.
- Akbadian S, Ruehl MG, Bliven E, Luiz LA, Peranelli AC, Baker SP, Roberts RC, Bunney WE Jr., Conley RC, Jones EG, Tamminga CA, Guo Y (2005) Chromatin alterations associated with down-regulated metabolic gene expression in the pre-frontal cortex of subjects with schizophrenia. *Arch Gen Psychiatry* 62:829–840.
- Akhtar MW, Raingo J, Nelson ED, Montgomery RL, Olson EN, Kavalali ET, Monteggia LM (2009) Histone deacetylases 1 and 2 form a developmental switch that controls excitatory synapse maturation and function. *J Neurosci* 29:8288–8297.
- Altar CA, Laeng P, Jurata LW, Brockman JA, Lemire A, Bullard J, Bukhman YV, Young TA, Charles V, Palfreyman MG (2004) Electroconvulsive seizures regulate gene expression of distinct neurotrophic signaling pathways. *J Neurosci* 24:2667–2677.
- Bayer KU, De Koninck P, Leonard AS, Hell JW, Schulman H (2001) Interaction with the NMDA receptor locks CaMKII in an active conformation. *Nature* 411:801–805.
- Beckmann AM, Wilce PA (1997) Egr transcription factors in the nervous system. *Neurochem Int* 31:477–510; Discussion 517–476.
- Boks MP, de Jong NM, Kas MJ, Vinkers CH, Fernandes C, Kahn RS, Mill J, Ophoff RA (2012) Current status and future prospects for epigenetic psychopharmacology. *Epigenetics* 7:20–28.
- Broide RS, Redwine JM, Aftahi N, Young W, Bloom FE, Winrow CJ (2007) Distribution of histone deacetylases 1–11 in the rat brain. *J Mol Neurosci* 31:47–58.
- Caplan G (1946) Electrical convulsion therapy in the treatment of epilepsy. *J Ment Sci* 92:784–793.

- Carew JS, Giles FJ, Nawrocki ST (2008) Histone deacetylase inhibitors: mechanisms of cell death and promise in combination cancer therapy. *Cancer Lett* 269:7–17.
- Cassel S, Carouge D, Gensburger C, Anglard P, Burgun C, Dietrich JB, Aunis D, Zwiller J (2006) Fluoxetine and cocaine induce the epigenetic factors MeCP2 and MBD1 in adult rat brain. *Mol Pharmacol* 70:487–492.
- Chakrabarti SK, James JC, Mirmira RG (2002) Quantitative assessment of gene targeting *in vitro* and *in vivo* by the pancreatic transcription factor, Pdx1. Importance of chromatin structure in directing promoter binding. *J Biol Chem* 277:13286–13293.
- Coskun V, Tsoa R, Sun YE (2012) Epigenetic regulation of stem cells differentiating along the neural lineage. *Curr Opin Neurobiol* 22:762–767.
- Covington HE III, Maze I, LaPlant QC, Vialou VF, Ohnishi YN, Berton O, Fass DM, Renthal W, Rush AJ III, Wu EY, Ghose S, Krishnan V, Russo SJ, Tamminga C, Haggarty SJ, Nestler EJ (2009) Antidepressant actions of histone deacetylase inhibitors. *J Neurosci* 29:11451–11460.
- Crowe SL, Tsukerman S, Gale K, Jorgensen TJ, Kondratyev AD (2011) Phosphorylation of histone H2A.X as an early marker of neuronal endangerment following seizures in the adult rat brain. *J Neurosci* 31:7648–7656.
- de Ruijter AJ, van Gennip AH, Caron HN, Kemp S, van Kuilenburg AB (2003) Histone deacetylases (HDACs): characterization of the classical HDAC family. *Biochem J* 370:737–749.
- Dyrvig M, Hansen HH, Christiansen SH, Woldbye DP, Mikkelsen JD, Lichota J (2012) Epigenetic regulation of Arc and c-Fos in the hippocampus after acute electroconvulsive stimulation in the rat. *Brain Res Bull* 88:507–513.
- Fischer A, Sananbenesi F, Wang X, Dobbin M, Tsai LH (2007) Recovery of learning and memory is associated with chromatin remodelling. *Nature* 447:178–182.
- Freeman WM, Patel KM, Brucklacher RM, Lull ME, Erwin M, Morgan D, Roberts DC, Vrana KE (2008) Persistent alterations in mesolimbic gene expression with abstinence from cocaine self-administration. *Neuropsychopharmacology* 33:1807–1817.
- Fryland T, Elfving B, Christensen JH, Mors O, Wegener G, Borglum AD (2012) Electroconvulsive seizures regulates the Brd1 gene in the frontal cortex and hippocampus of the adult rat. *Neurosci Lett* 516:110–113.
- Fujino T, Lee WC, Nedivi E (2003) Regulation of cpG15 by signaling pathways that mediate synaptic plasticity. *Mol Cell Neurosci* 24:538–554.
- Fujino T, Wu Z, Lin WC, Phillips MA, Nedivi E (2008) cpG15 and cpG15-2 constitute a family of activity-regulated ligands expressed differentially in the nervous system to promote neurite growth and neuronal survival. *J Comp Neurol* 507:1831–1845.
- Gavin DP, Kartan S, Chase K, Jayaraman S, Sharma RP (2009) Histone deacetylase inhibitors and candidate gene expression: an *in vivo* and *in vitro* approach to studying chromatin remodeling in a clinical population. *J Psychiatr Res* 43:870–876.
- Goebel DJ, Poosch MS (1999) NMDA receptor subunit gene expression in the rat brain: a quantitative analysis of endogenous mRNA levels of NR1Com, NR2A, NR2B, NR2C, NR2D and NR3A. *Brain Res Mol Brain Res* 69:164–170.
- Gottlicher M, Minucci S, Zhu P, Kramer OH, Schimpf A, Giavara S, Sleeman JP, Lo Coco F, Nervi C, Pelicci PG, Heinzel T (2001) Valproic acid defines a novel class of HDAC inhibitors inducing differentiation of transformed cells. *EMBO J* 20:6969–6978.
- Graff J, Tsai LH (2013) Histone acetylation: molecular mnemonics on the chromatin. *Nat Rev Neurosci* 14:97–111.
- Grozinger CM, Schreiber SL (2002) Deacetylase enzymes: biological functions and the use of small-molecule inhibitors. *Chem Biol* 9:3–16.
- Guan JS, Haggarty SJ, Giacometti E, Dannenberg JH, Joseph N, Gao J, Nieland TJ, Zhou Y, Wang X, Mazitschek R, Bradner JE, DePinho RA, Jaenisch R, Tsai LH (2009) HDAC2 negatively regulates memory formation and synaptic plasticity. *Nature* 459:55–60.
- Guidotti A, Dong E, Kundakovic M, Satta R, Grayson DR, Costa E (2009) Characterization of the action of antipsychotic subtypes on valproate-induced chromatin remodeling. *Trends Pharmacol Sci* 30:55–60.
- Guzowski JF, Setlow B, Wagner EK, McGaugh JL (2001) Experience-dependent gene expression in the rat hippocampus after spatial learning: a comparison of the immediate-early genes Arc, c-fos, and zif268. *J Neurosci* 21:5089–5098.
- Haggarty SJ, Tsai LH (2011) Probing the role of HDACs and mechanisms of chromatin-mediated neuroplasticity. *Neurobiol Learn Mem* 96:41–52.
- Huang HL, Lee HY, Tsai AC, Peng CY, Lai MJ, Wang JC, Pan SL, Teng CM, Liou JP (2012a) Anticancer activity of MPT0E028, a novel potent histone deacetylase inhibitor, in human colorectal cancer HCT116 cells *in vitro* and *in vivo*. *PLoS ONE* 7:e43645. Doi:10.1371/journal.pone.0043645.
- Huang Y, Zhao F, Wang L, Yin H, Zhou C, Wang X (2012b) Increased expression of histone deacetylases 2 in temporal lobe epilepsy: a study of epileptic patients and rat models. *Synapse* 66:151–159.
- Hudmon A, Schulman H (2002) Structure-function of the multi-functional Ca<sup>2+</sup>/calmodulin-dependent protein kinase II. *Biochem J* 364:593–611.
- Jiang Y, Langley B, Lubin FD, Renthal W, Wood MA, Yasui DH, Kumar A, Nestler EJ, Akbarian S, Beckel-Mitchener AC (2008) Epigenetics in the nervous system. *J Neurosci* 28:11753–11759.
- Karamoysoyli E, Burnand RC, Tomlinson DR, Gardiner NJ (2008) Neuritin mediates nerve growth factor-induced axonal regeneration and is deficient in experimental diabetic neuropathy. *Diabetes* 57:181–189.
- Kato N (2009) Neurophysiological mechanisms of electroconvulsive therapy for depression. *Neurosci Res* 64:3–11.
- Kim BW, Yang S, Lee CH, Son H (2011) A critical time window for the survival of neural progenitor cells by HDAC inhibitors in the hippocampus. *Mol Cells* 31:159–164.
- Kim SH, Yu HS, Park HG, Jeon WJ, Song JY, Kang UG, Ahn YM, Lee YH, Kim YS (2008) Dose-dependent effect of intracerebroventricular injection of ouabain on the phosphorylation of the MEK1/2-ERK1/2-p90RSK pathway in the rat brain related to locomotor activity. *Prog Neuropsychopharmacol Biol Psychiatry* 32:1637–1642.
- Kim SH, Kim MK, Yu HS, Kim HS, Park IS, Park HG, Kang UG, Kim YS (2010) Electroconvulsive seizure increases phosphorylation of PKC substrates, including GAP-43, MARCKS, and neurogranin, in rat brain. *Prog Neuropsychopharmacol Biol Psychiatry* 34:115–121.
- Kim SH, Yu HS, Park HG, Ha K, Kim YS, Shin SY, Ahn YM (2013) Intracerebroventricular administration of ouabain, a Na<sup>+</sup>/K-ATPase inhibitor, activates mTOR signal pathways and



- protein translation in the rat frontal cortex. *Prog Neuropsychopharmacol Biol Psychiatry* 45C:73–82.
- Kramer OH (2009) HDAC2: a critical factor in health and disease. *Trends Pharmacol Sci* 30:647–655.
- Kubista M, Akerman B, Norden B (1987) Characterization of interaction between DNA and 4',6-diamidino-2-phenylindole by optical spectroscopy. *Biochemistry* 26:4545–4553.
- Kurita M et al. (2012) HDAC2 regulates atypical antipsychotic responses through the modulation of mGlu2 promoter activity. *Nat Neurosci* 15:1245–1254.
- Lahm A, Paolini C, Pallaoro M, Nardi MC, Jones P, Neddermann P, Sambucini S, Bottomley MJ, Lo Surdo P, Carfi A, Koch U, De Francesco R, Steinkuhler C, Gallinari P (2007) Unraveling the hidden catalytic activity of vertebrate class IIa histone deacetylases. *Proc Natl Acad Sci USA* 104:17335–17340.
- Levenson JM, Sweatt JD (2005) Epigenetic mechanisms in memory formation. *Nat Rev Neurosci* 6:108–118.
- Levenson JM, O'Riordan KJ, Brown KD, Trinh MA, Molfese DL, Sweatt JD (2004) Regulation of histone acetylation during memory formation in the hippocampus. *J Biol Chem* 279:40545–40559.
- Li J, Guo Y, Schroeder FA, Youngs RM, Schmidt TW, Ferris C, Konradi C, Akbarian S (2004) Dopamine D2-like antagonists induce chromatin remodeling in striatal neurons through cyclic AMP-protein kinase A and NMDA receptor signaling. *J Neurochem* 90:1117–1131.
- Lisanby SH (2007) Electroconvulsive therapy for depression. *N Engl J Med* 357:1939–1945.
- Lisman J, Schulman H, Cline H (2002) The molecular basis of CaMKII function in synaptic and behavioural memory. *Nat Rev Neurosci* 3:175–190.
- Marwick JA, Kirkham PA, Stevenson CS, Danahay H, Giddings J, Butler K, Donaldson K, Macnee W, Rahman I (2004) Cigarette smoke alters chromatin remodeling and induces proinflammatory genes in rat lungs. *Am J Respir Cell Mol Biol* 31:633–642.
- Merkel A, Heuser I, Bajbouj M (2009) Antidepressant electroconvulsive therapy: mechanism of action, recent advances and limitations. *Exp Neurol* 219:20–26.
- Mikkelsen JD, Woldbye D, Kragh J, Larsen PJ, Bolwig TG (1994) Electroconvulsive shocks increase the expression of neuropeptide Y (NPY) mRNA in the piriform cortex and the dentate gyrus. *Brain Res Mol Brain Res* 23:317–322.
- Mokin M, Keifer J (2005) Expression of the immediate-early gene-encoded protein Egr-1 (zif268) during *in vitro* classical conditioning. *Learn Mem* 12:144–149.
- Montgomery RL, Hsieh J, Barbosa AC, Richardson JA, Olson EN (2009) Histone deacetylases 1 and 2 control the progression of neural precursors to neurons during brain development. *Proc Natl Acad Sci USA* 106:7876–7881.
- Mukherjee S, Sackeim HA, Schnur DB (1994) Electroconvulsive therapy of acute manic episodes: a review of 50 years' experience. *Am J Psychiatry* 151:169–176.
- Mullen RJ, Buck CR, Smith AM (1992) NeuN, a neuronal specific nuclear protein in vertebrates. *Development* 116:201–211.
- Naeve GS, Ramakrishnan M, Kramer R, Hevroni D, Citri Y, Theill LE (1997) Neuritin: a gene induced by neural activity and neurotrophins that promotes neuritogenesis. *Proc Natl Acad Sci USA* 94:2648–2653.
- Nedivi E, Wu GY, Cline HT (1998) Promotion of dendritic growth by CPG15, an activity-induced signaling molecule. *Science* 281:1863–1866.
- Newton SS, Collier EF, Hunsberger J, Adams D, Terwilliger R, Selvanayagam E, Duman RS (2003) Gene profile of electroconvulsive seizures: induction of neurotrophic and angiogenic factors. *J Neurosci* 23:10841–10851.
- Nott A, Watson PM, Robinson JD, Crepaldi L, Riccio A (2008) S-Nitrosylation of histone deacetylase 2 induces chromatin remodelling in neurons. *Nature* 455:411–415.
- Ookubo M, Kanai H, Aoki H, Yamada N (2013) Antidepressants and mood stabilizers effects on histone deacetylase expression in C57BL/6 mice: brain region specific changes. *J Psychiatr Res* 47:1204–1214.
- Park HG, Kim SH, Kim HS, Ahn YM, Kang UG, Kim YS (2011) Repeated electroconvulsive seizure treatment in rats reduces inducibility of early growth response genes and hyperactivity in response to cocaine administration. *Prog Neuropsychopharmacol Biol Psychiatry* 35:1014–1021.
- Paxinos G, Watson C (1998) The rat brain in stereotactic coordinates, 4th edn. Sydney: Academic Press.
- Phiel CJ, Zhang F, Huang EY, Guenther MG, Lazar MA, Klein PS (2001) Histone deacetylase is a direct target of valproic acid, a potent anticonvulsant, mood stabilizer, and teratogen. *J Biol Chem* 276:36734–36741.
- Ploski JE, Newton SS, Duman RS (2006) Electroconvulsive seizure-induced gene expression profile of the hippocampus dentate gyrus granule cell layer. *J Neurochem* 99:1122–1132.
- Post RM, Putnam F, Contel NR, Goldman B (1984) Electroconvulsive seizures inhibit amygdala kindling: implications for mechanisms of action in affective illness. *Epilepsia* 25:234–239.
- Raff MC, Fields KL, Hakomori SI, Mirsky R, Pruss RM, Winter J (1979) Cell-type-specific markers for distinguishing and studying neurons and the major classes of glial cells in culture. *Brain Res* 174:283–308.
- Renthal W, Maze I, Krishnan V, Covington HE III, Xiao G, Kumar A, Russo SJ, Graham A, Tsankova N, Kippin TE, Kerstetter KA, Neve RL, Haggarty SJ, McKinsey TA, Bassel-Duby R, Olson EN, Nestler EJ (2007) Histone deacetylase 5 epigenetically controls behavioral adaptations to chronic emotional stimuli. *Neuron* 56:517–529.
- Sackeim HA (1999) The anticonvulsant hypothesis of the mechanisms of action of ECT: current status. *J ECT* 15:5–26.
- Sackeim HA, Decina P, Prohovnik I, Malitz S, Resor SR (1983) Anticonvulsant and antidepressant properties of electroconvulsive therapy: a proposed mechanism of action. *Biol Psychiatry* 18:1301–1310.
- Sanhueza M, Fernandez-Villalobos G, Stein IS, Kasumova G, Zhang P, Bayer KU, Otmakhov N, Hell JW, Lisman J (2011) Role of the CaMKII/NMDA receptor complex in the maintenance of synaptic strength. *J Neurosci* 31:9170–9178.
- Schroeder FA, Lin CL, Crusio WE, Akbarian S (2007) Antidepressant-like effects of the histone deacetylase inhibitor, sodium butyrate, in the mouse. *Biol Psychiatry* 62:55–64.
- Segi-Nishida E (2011) Exploration of new molecular mechanisms for antidepressant actions of electroconvulsive seizure. *Biol Pharm Bull* 34:939–944.
- Sharma RP, Rosen C, Kartan S, Guidotti A, Costa E, Grayson DR, Chase K (2006) Valproic acid and chromatin remodeling in schizophrenia and bipolar disorder: preliminary results from a clinical population. *Schizophr Res* 88:227–231.

- Sharma RP, Grayson DR, Gavin DP (2008) Histone deacetylase 1 expression is increased in the prefrontal cortex of schizophrenia subjects: analysis of the National Brain Databank microarray collection. *Schizophr Res* 98:111–117.
- Stafford JM, Raybuck JD, Ryabinin AE, Lattal KM (2012) Increasing histone acetylation in the hippocampus-infralimbic network enhances fear extinction. *Biol Psychiatry* 72:25–33.
- Sun J, Ming GL, Song H (2011) Epigenetic regulation of neurogenesis in the adult mammalian brain. *Eur J Neurosci* 33:1087–1093.
- Tang B, Dean B, Thomas EA (2011) Disease- and age-related changes in histone acetylation at gene promoters in psychiatric disorders. *Transl Psychiatry* 1:e64. Doi: 10.1038/tp.2011.61.
- Tharyan P, Adams CE (2005) Electroconvulsive therapy for schizophrenia. *Cochrane Database Syst Rev* CD000076.
- Tsankova NM, Kumar A, Nestler EJ (2004) Histone modifications at gene promoter regions in rat hippocampus after acute and chronic electroconvulsive seizures. *J Neurosci* 24:5603–5610.
- Tsankova NM, Berton O, Renthal W, Kumar A, Neve RL, Nestler EJ (2006) Sustained hippocampal chromatin regulation in a mouse model of depression and antidepressant action. *Nat Neurosci* 9:519–525.
- Tsankova NM, Renthal W, Kumar A, Nestler EJ (2007) Epigenetic regulation in psychiatric disorders. *Nat Rev Neurosci* 8:355–367.
- Yang XJ, Seto E (2008) The Rpd3/Hda1 family of lysine deacetylases: from bacteria and yeast to mice and men. *Nat Rev Mol Cell Biol* 9:206–218.
- Zhu P, Martin E, Mengwasser J, Schlag P, Janssen KP, Gottlicher M (2004) Induction of HDAC2 expression upon loss of APC in colorectal tumorigenesis. *Cancer Cell* 5:455–463.
- Zimmermann S, Kiefer F, Prudenziati M, Spiller C, Hansen J, Floss T, Wurst W, Minucci S, Gottlicher M (2007) Reduced body size and decreased intestinal tumor rates in HDAC2-mutant mice. *Cancer Res* 67:9047–9054.
